# Supplementary material for: Huo Xue Tong Luo capsule, a vasoactive herbal formula prevents progression of asymptomatic osteonecrosis of femoral head: A prospective study
Source: PubMed Central journal article supplement — J Orthop Translat. 2018 Dec 21;18:65–73. doi: 10.1016/j.jot.2018.11.002 (PMC6718872; doi:10.1016/j.jot.2018.11.002), 2018-12-21
Supplement: mmc1.pdf [file mmc1.pdf]

# Case 1

Li, female, 36Y, steroid-ONFH, bone cyst

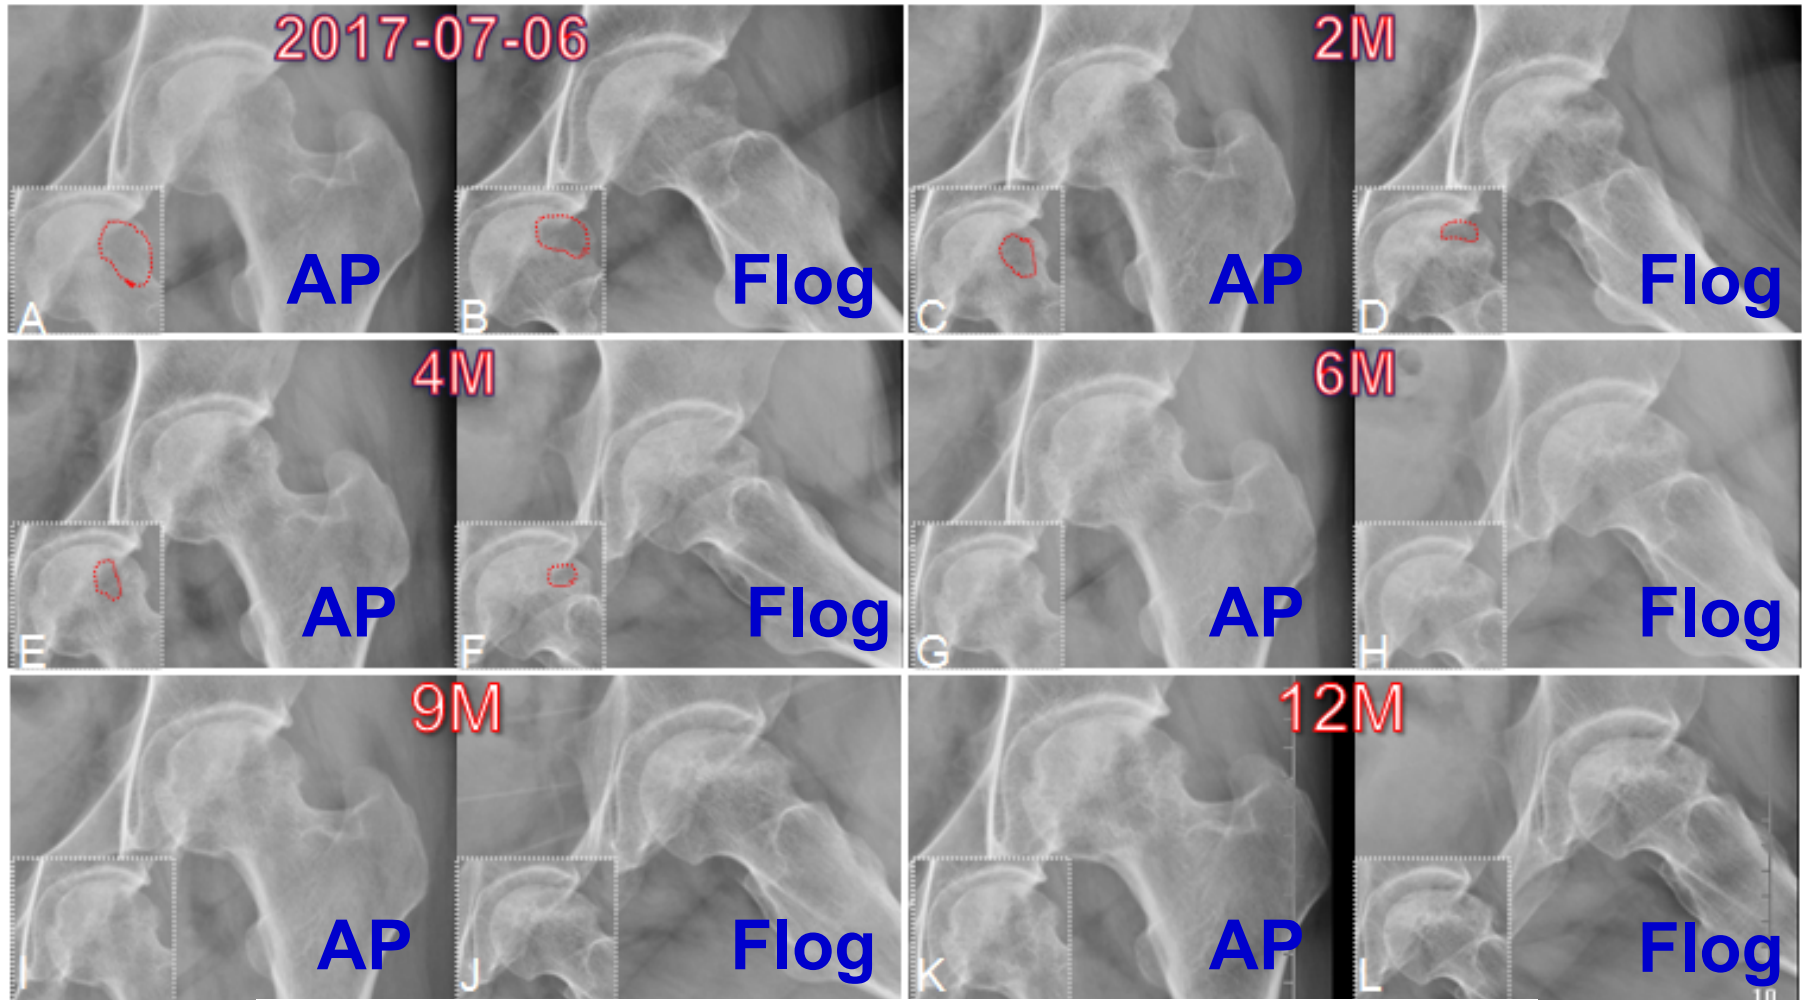

Hip pain for 3M; walking with stick;  
pain release in 2M; weight-bearing walking in 3M

# Li, female, 36Y, steroid-ONFH, bone cyst

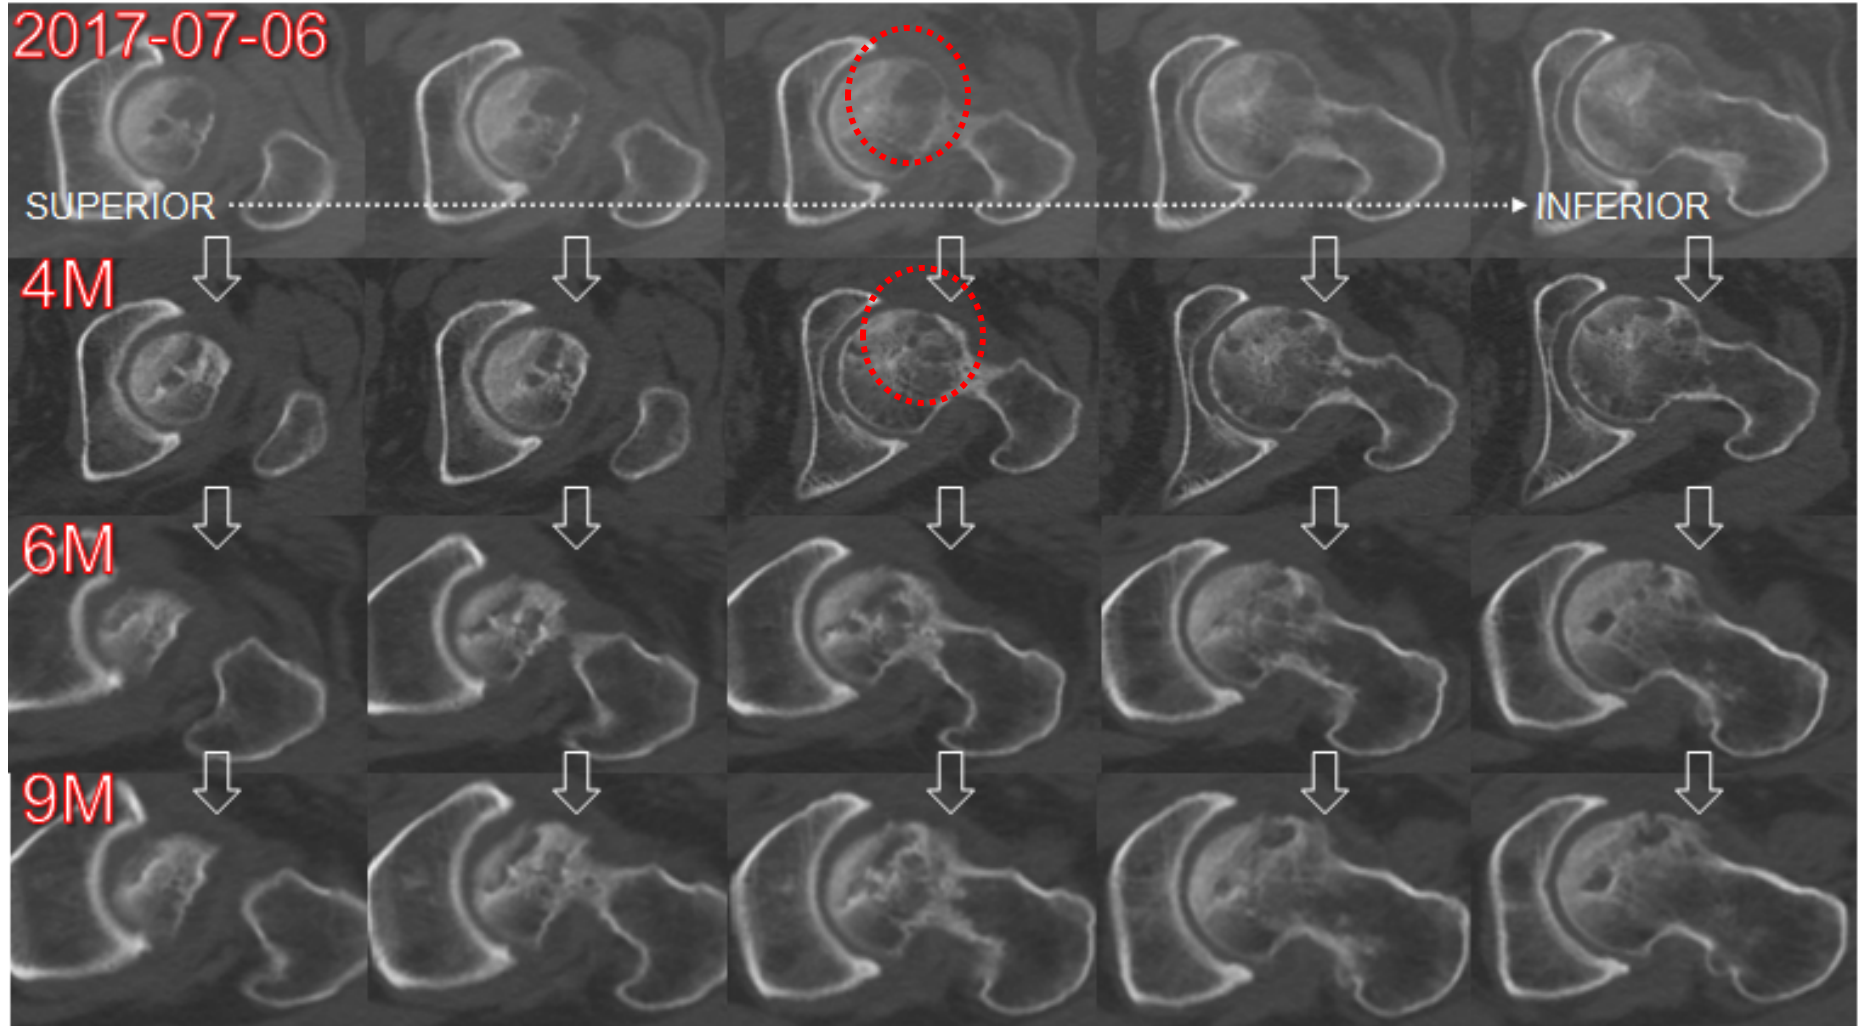

# Li, female, 36Y, steroid-ONFH, bone cyst

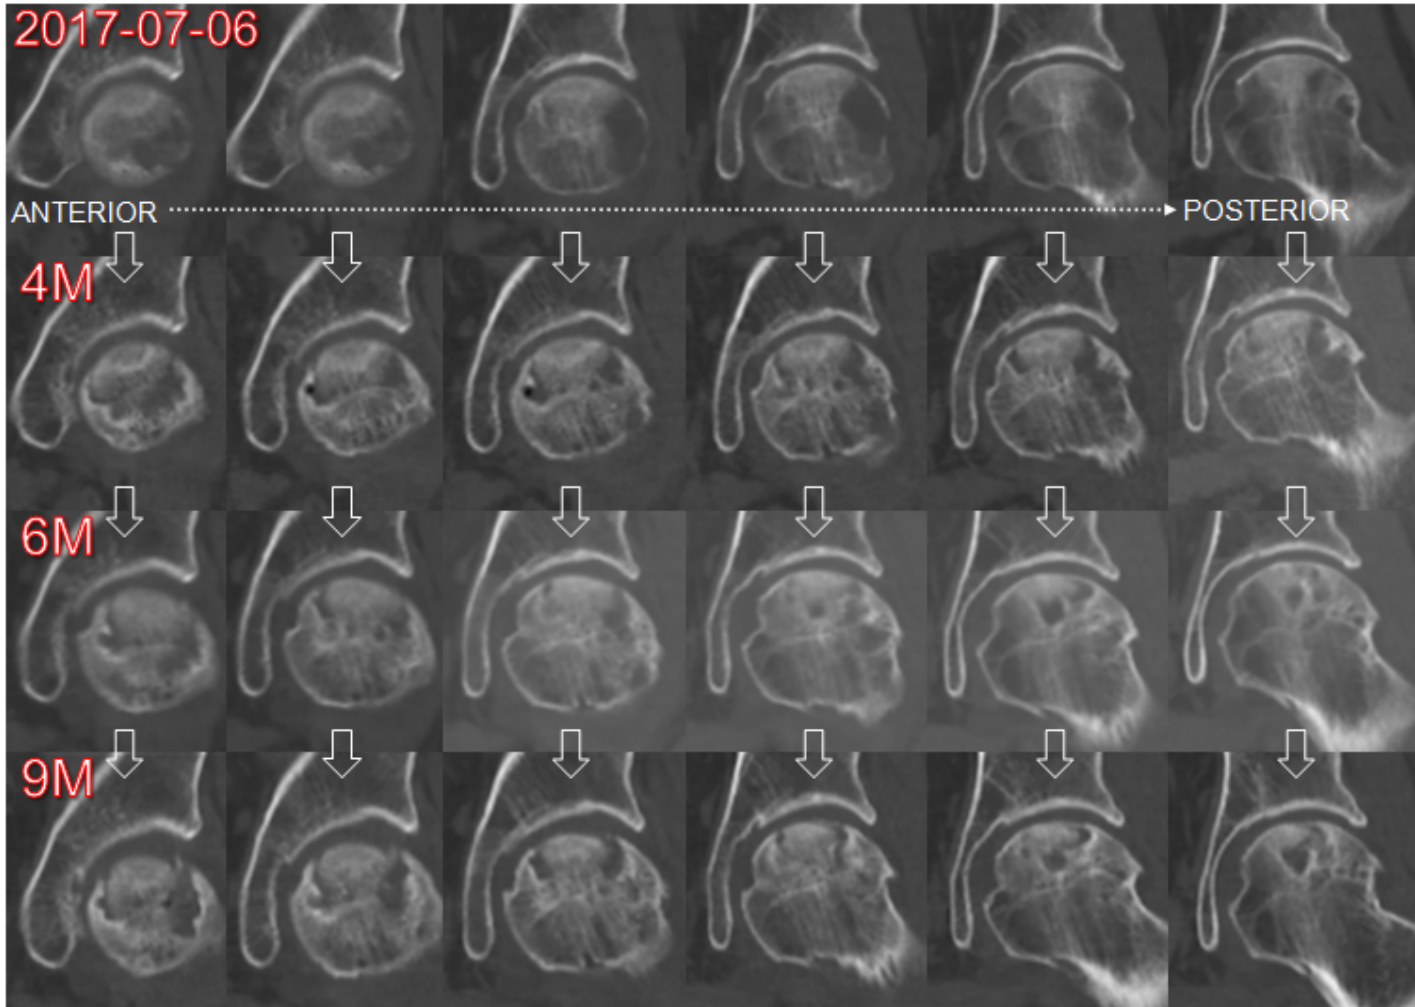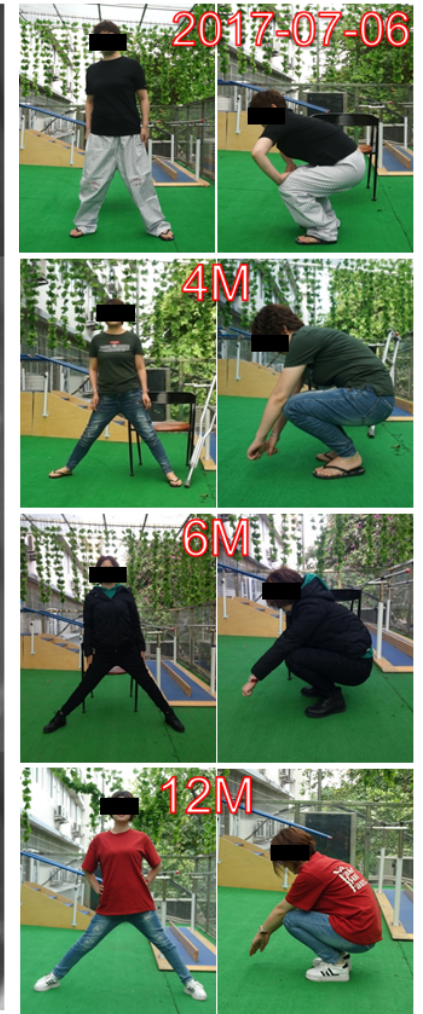

# Case 2

Zhou, female, 40Y, steroid-ONFH, bone cyst

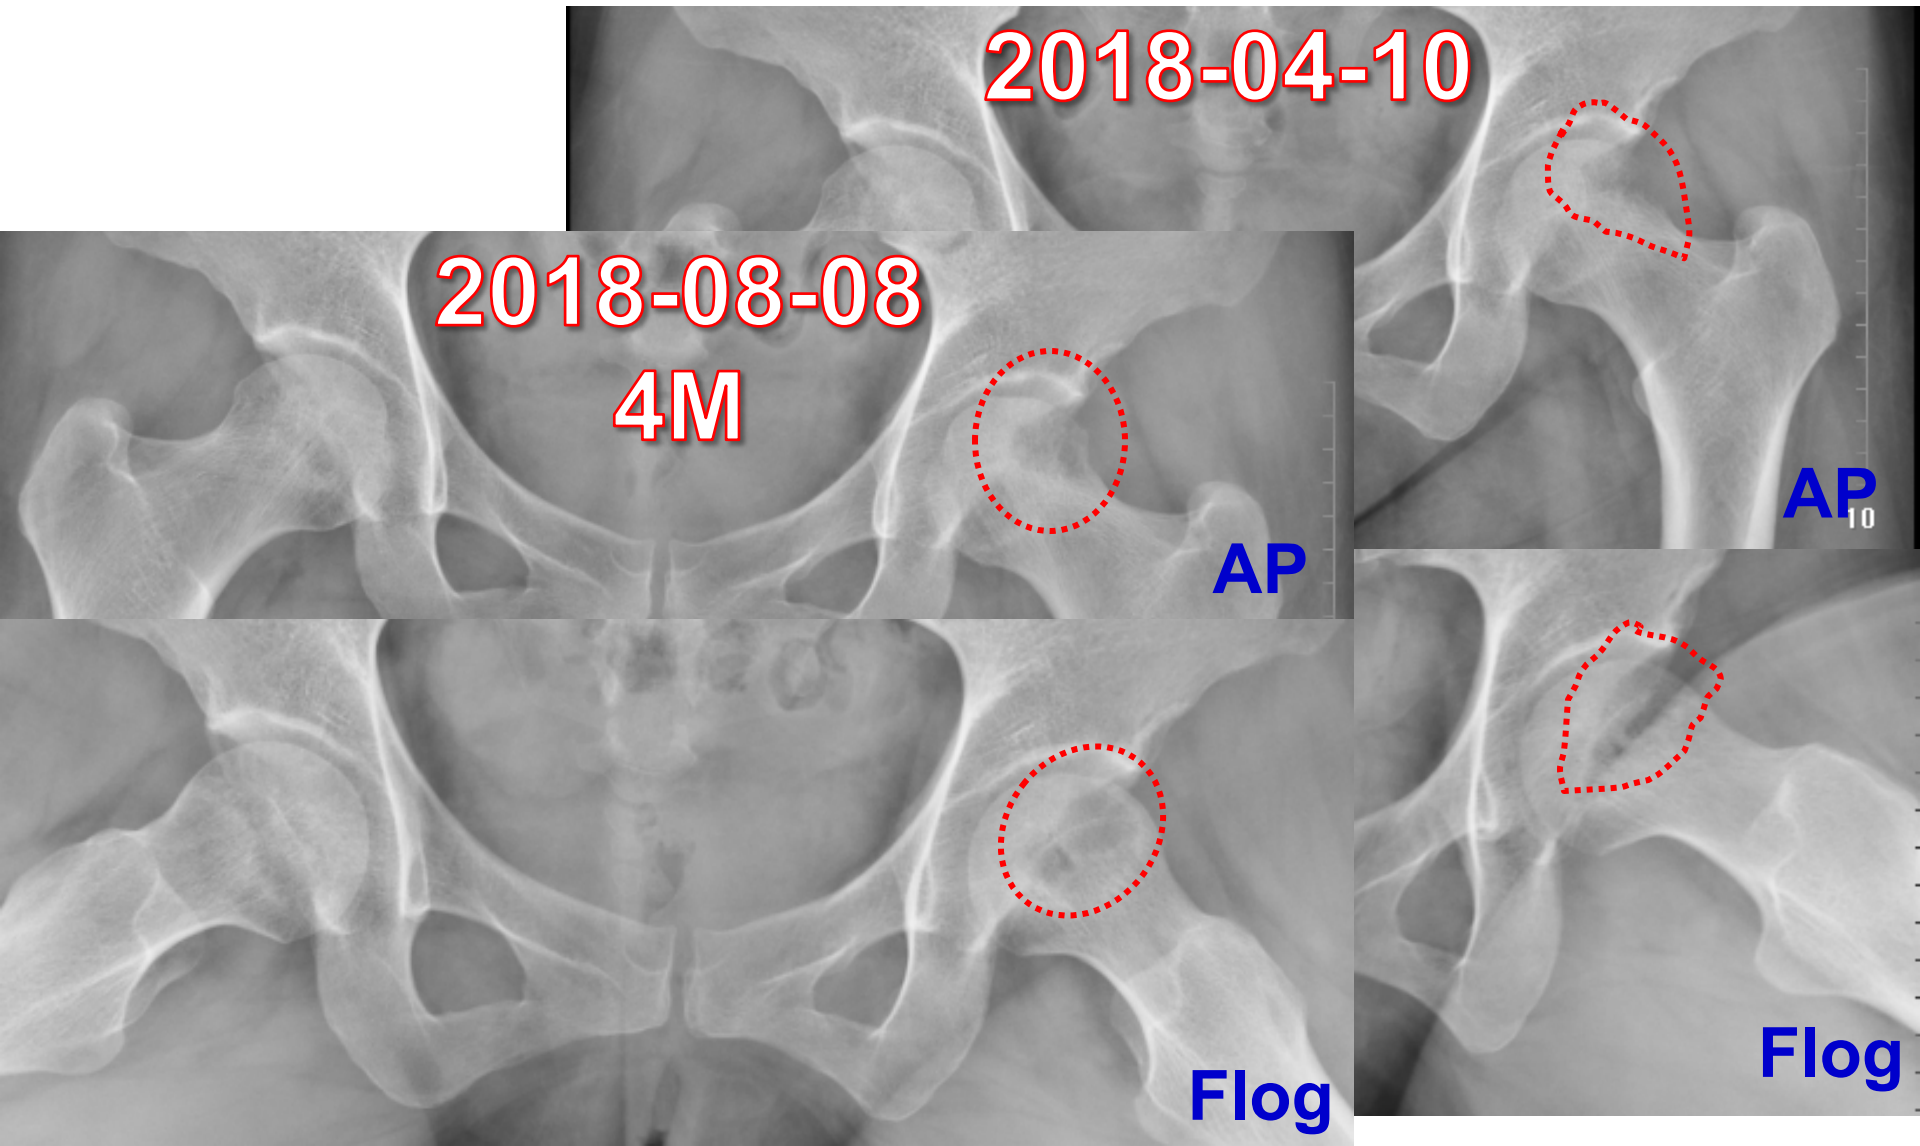

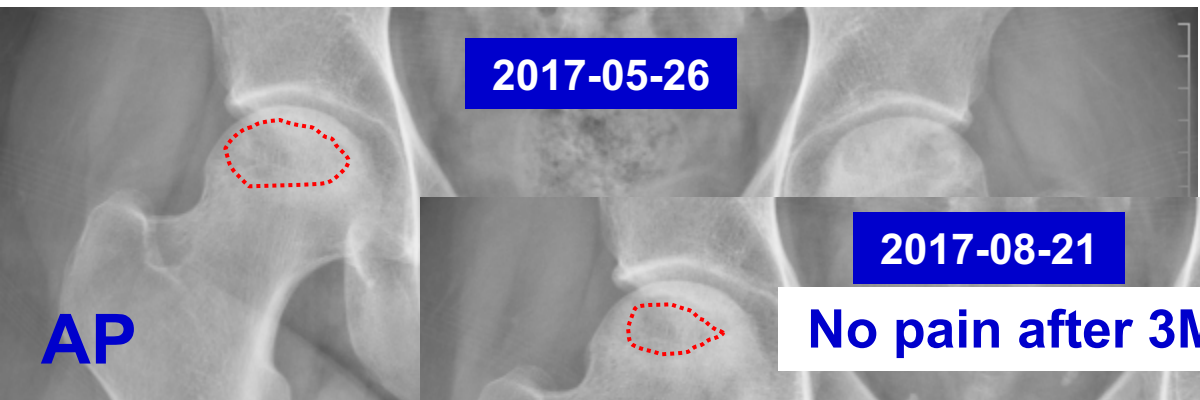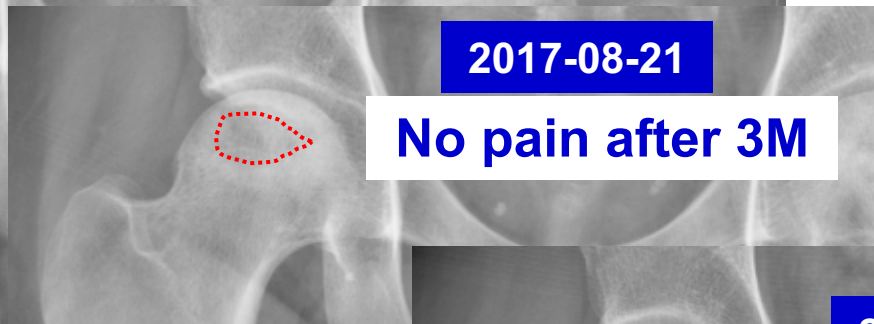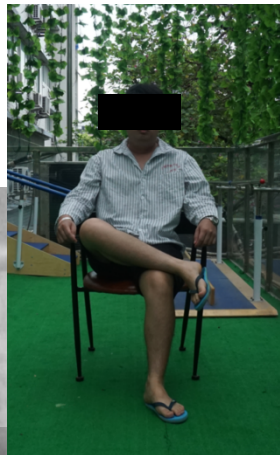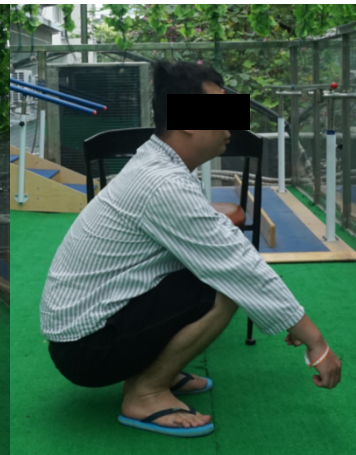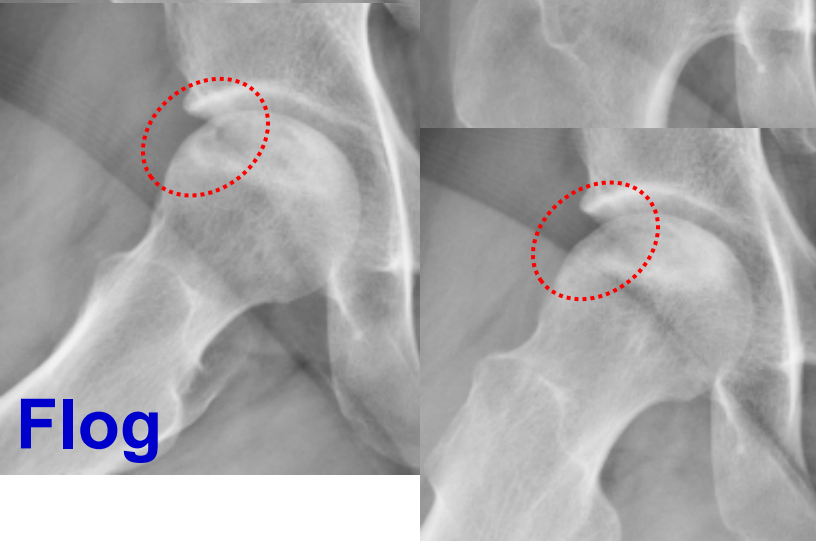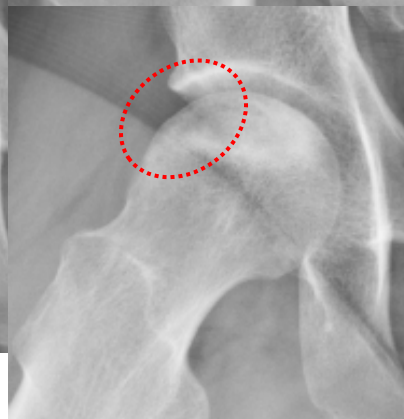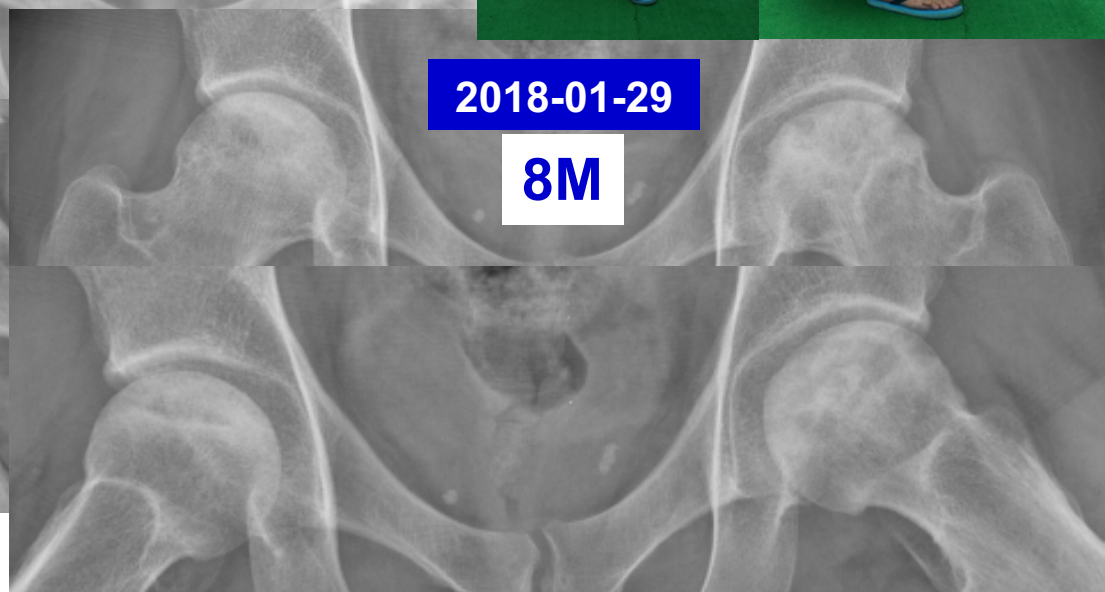

**Right hip pain for half of year, left hip pain for 1 month**

**Femoral head collapse, but is healing. Weight-bearing walking**

Left hip pain  
for 1M

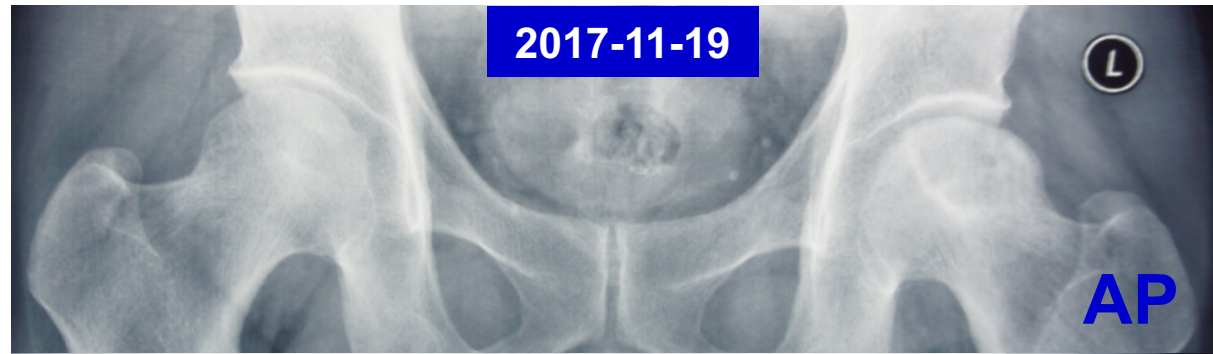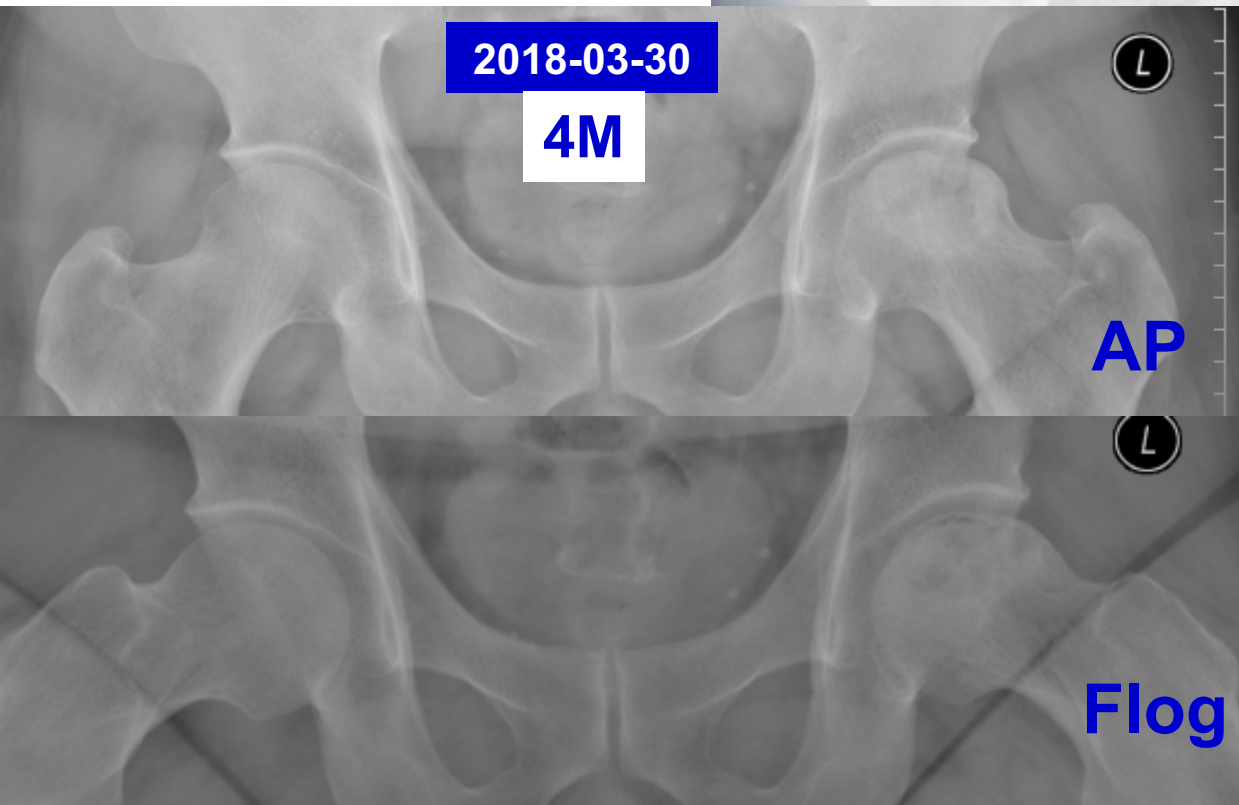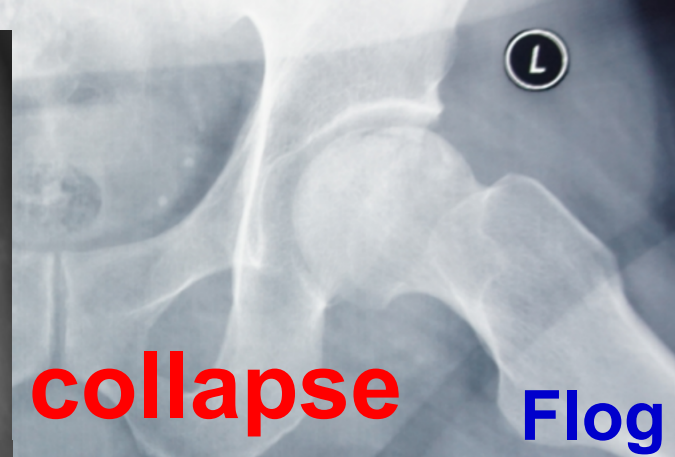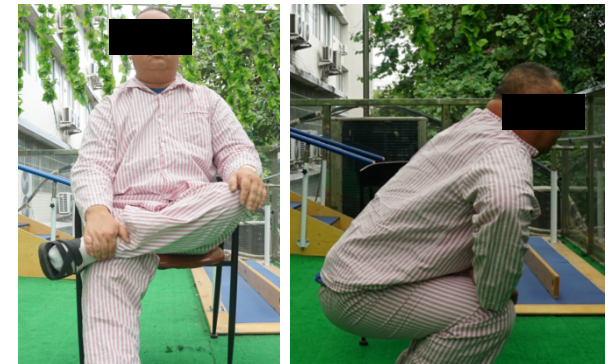

pain release; no progress in collapse of femoral head, but being healing

asymptomatic  
left hip

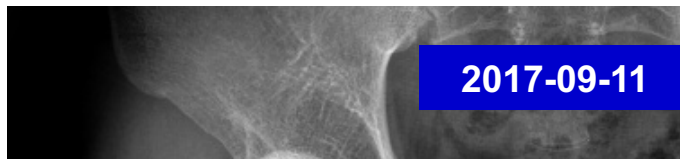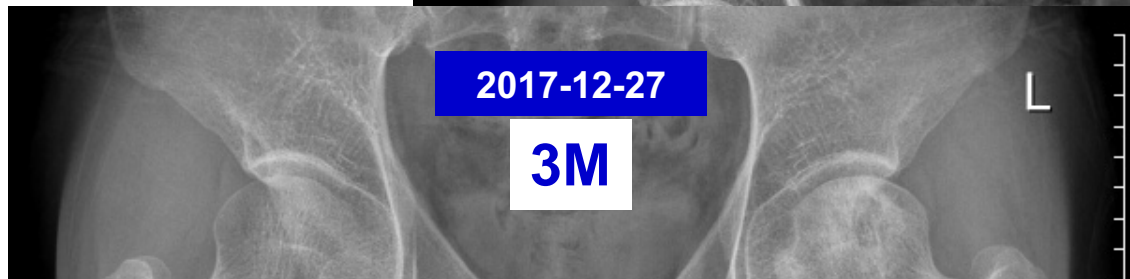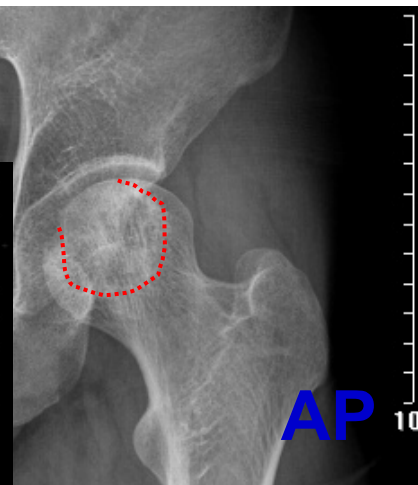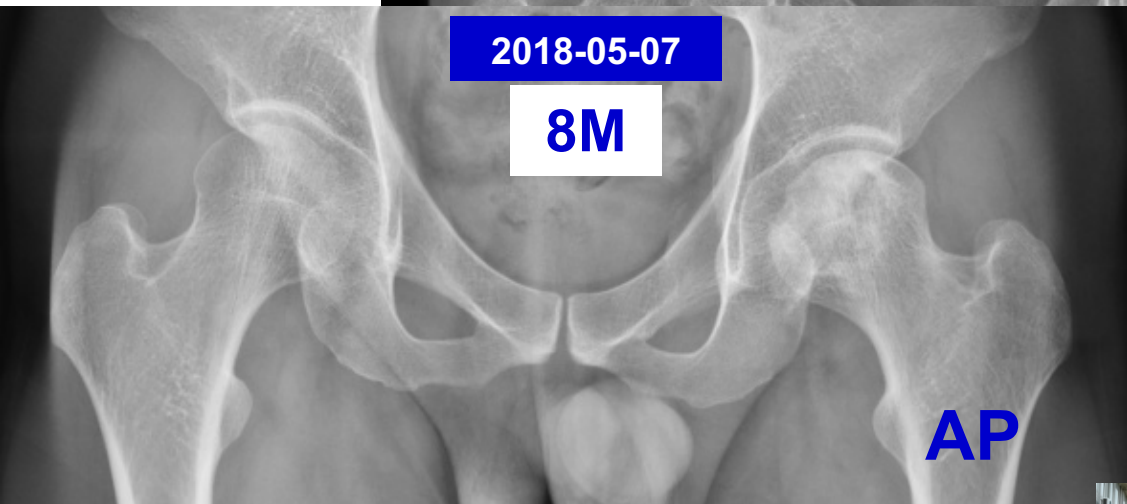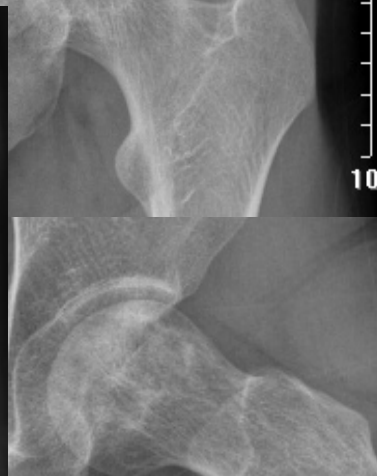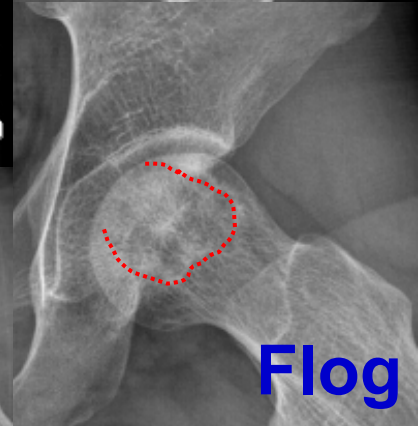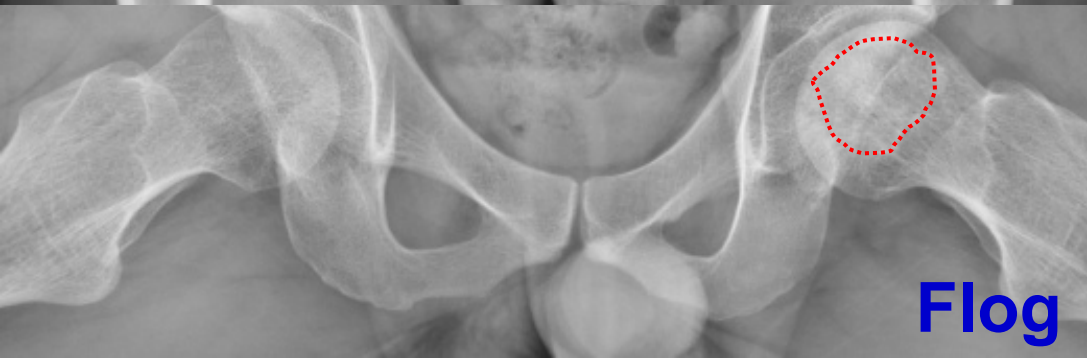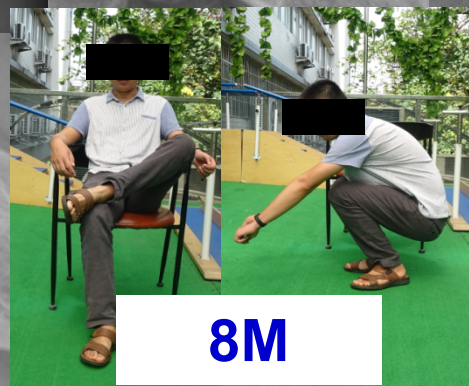

# Chen, Male, 35Y, steroid-ONFH

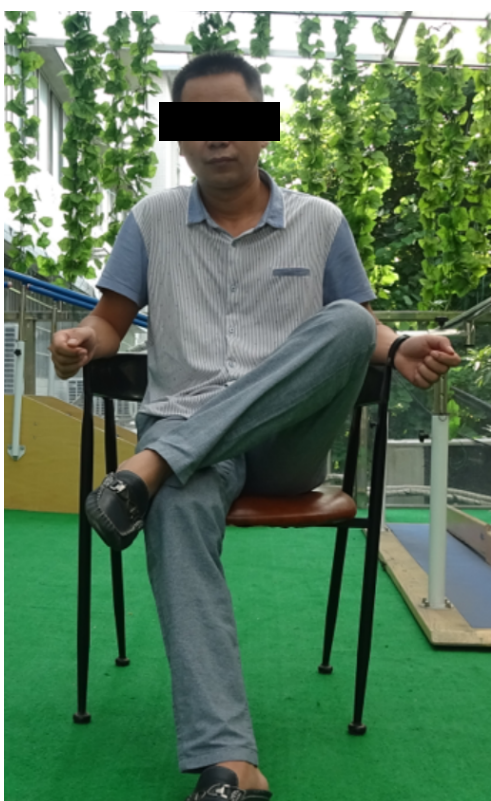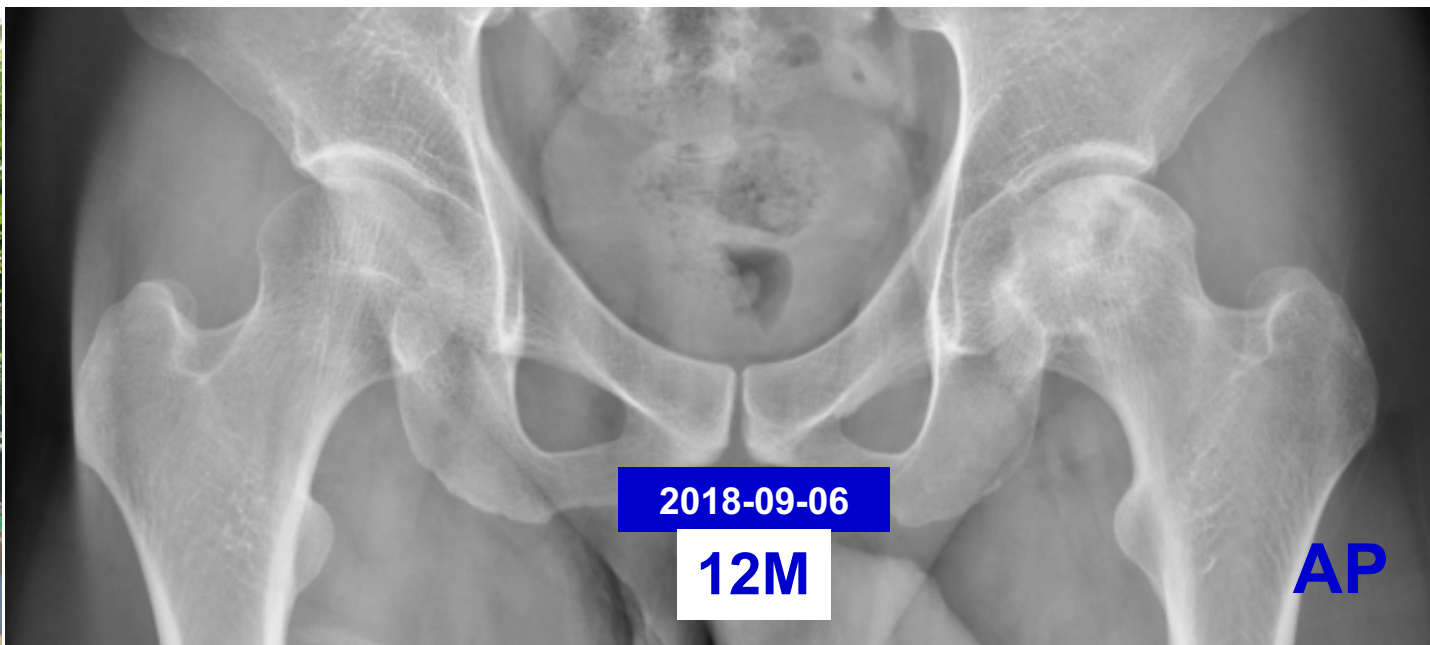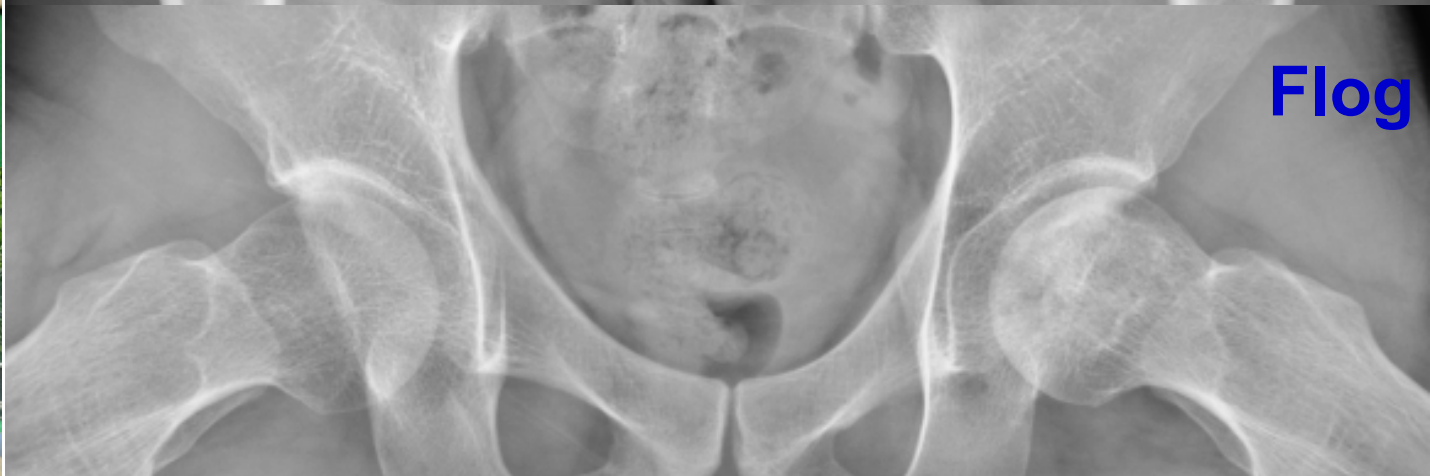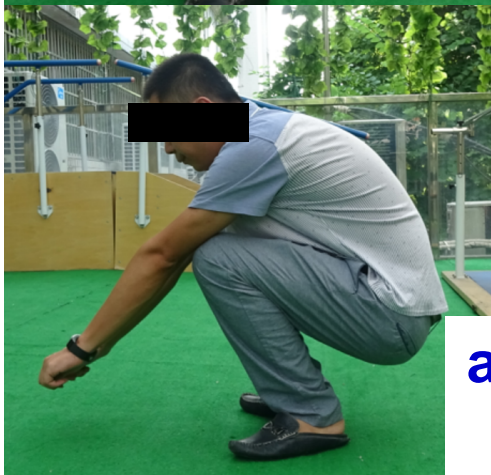

**asymptomatic left hip; no collapse of femoral head;  
weight-bearing walking without stick**



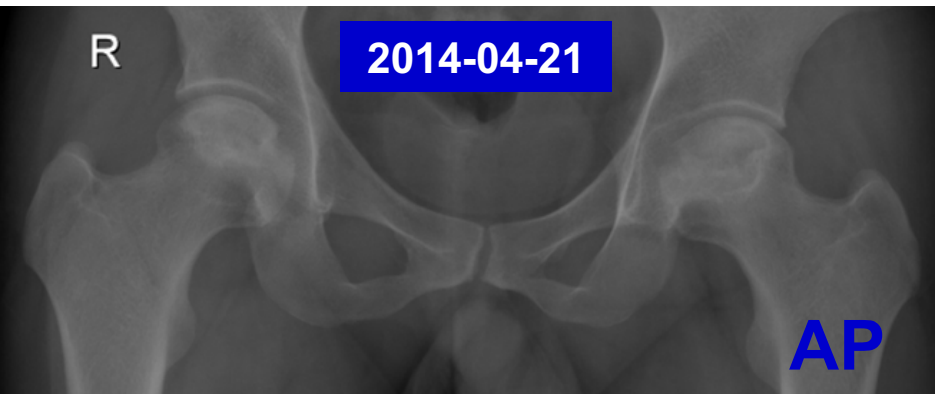

left hip pain for 5 years

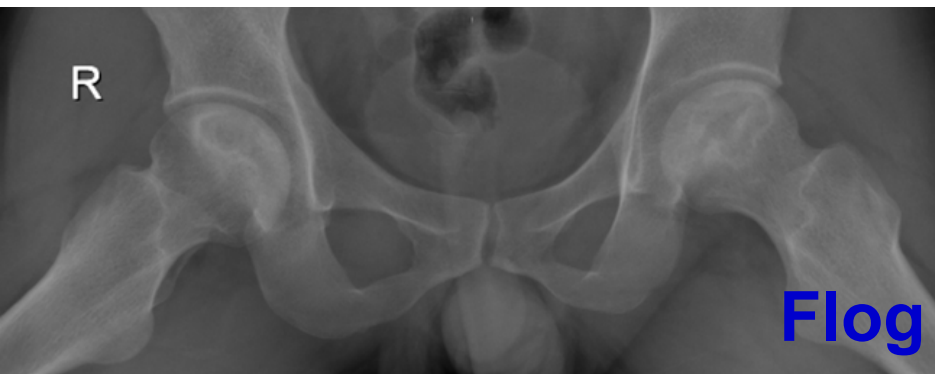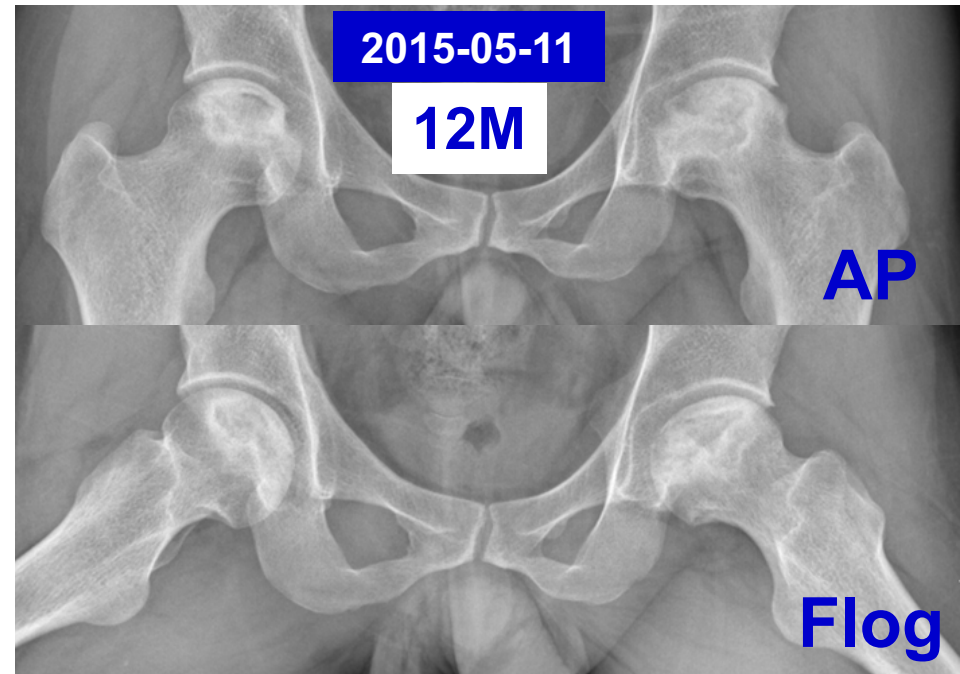

(ARCO II)

femoral head collapse; weight-bearing walking

# Duan, Male, 34Y, steroid-ONFH

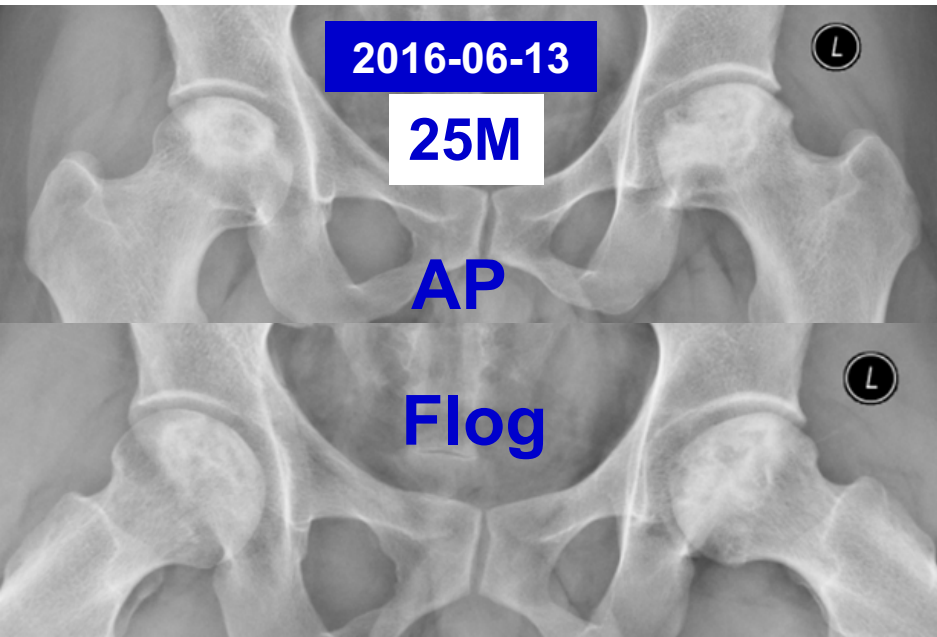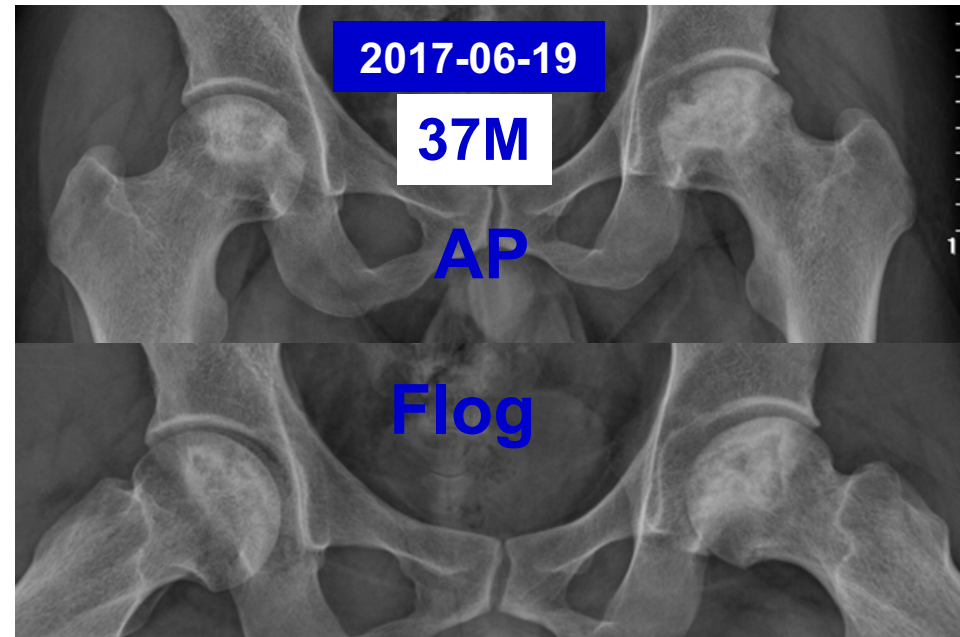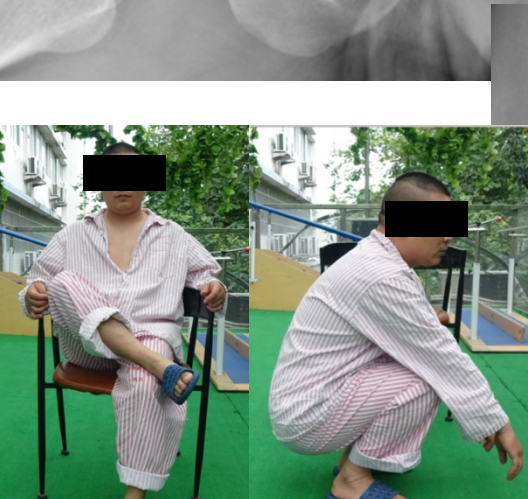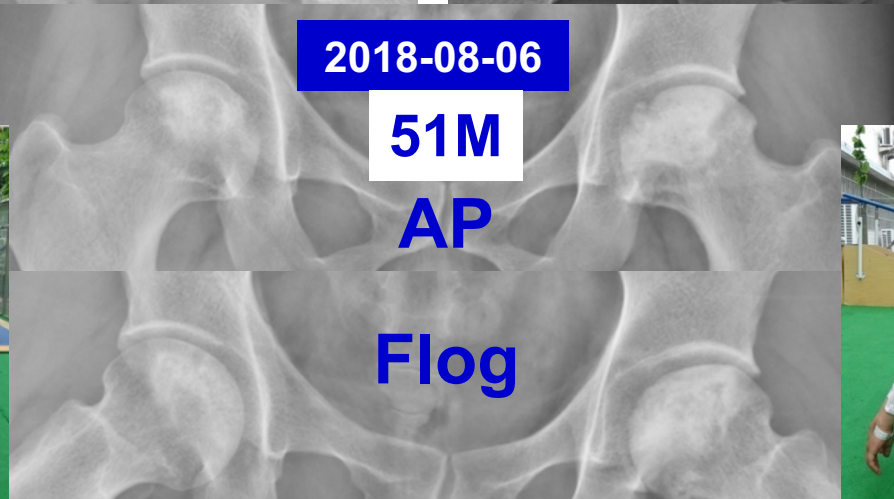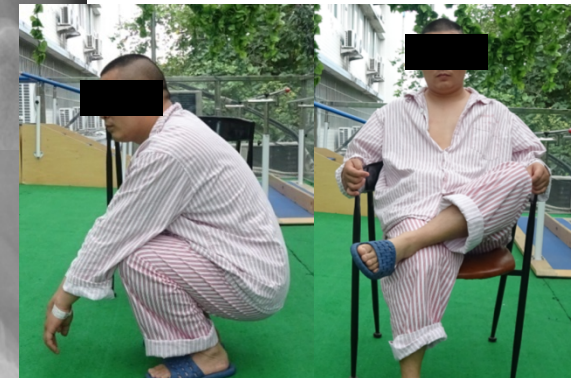

no progress in collapse of femoral head, but being healing  
weight-bearing walking

# Gong, Male, 45Y, steroid-ONFH

# Case 7

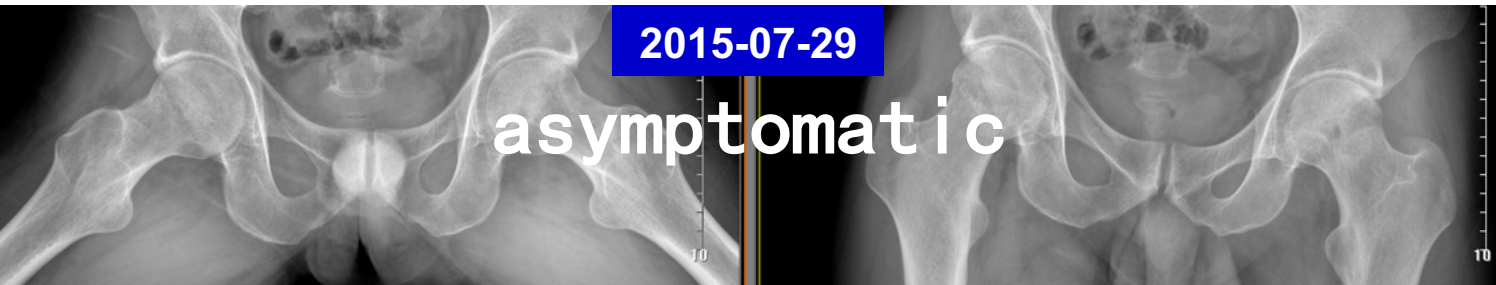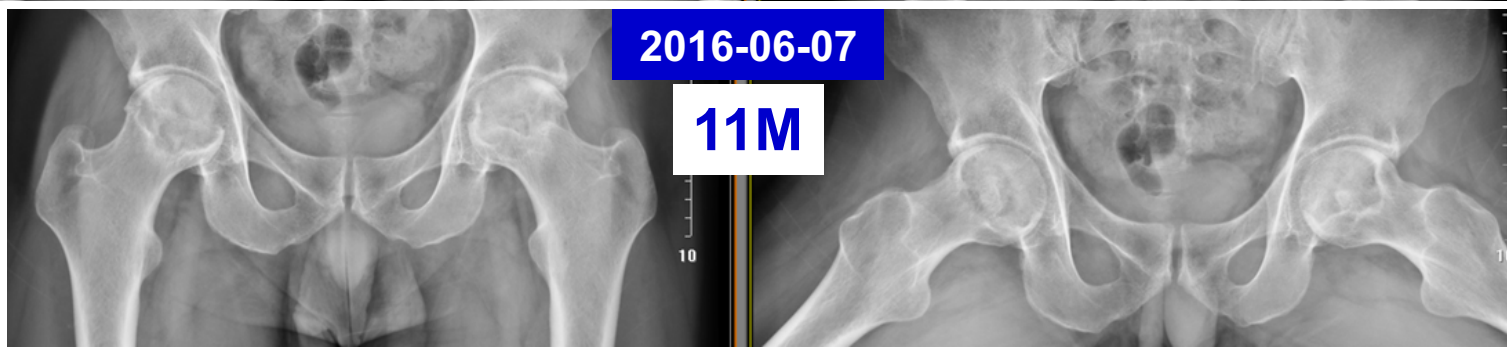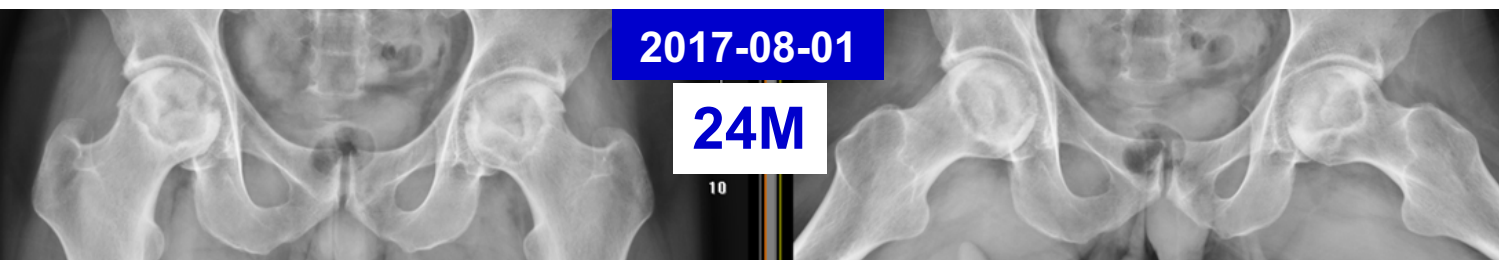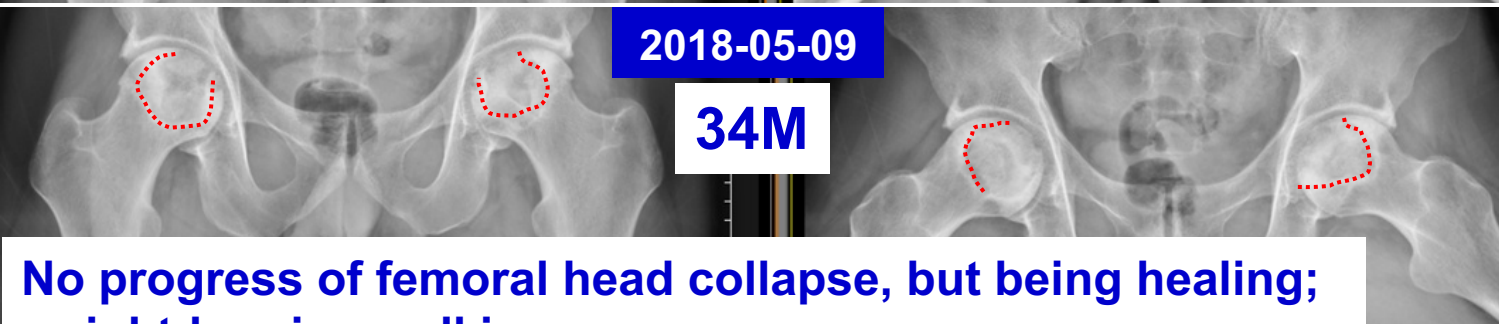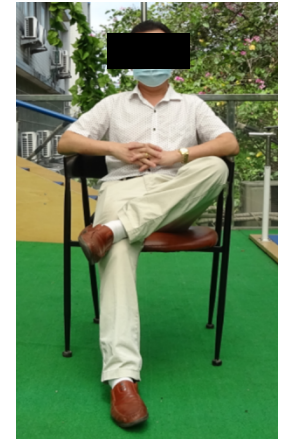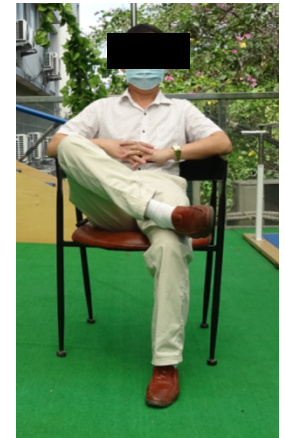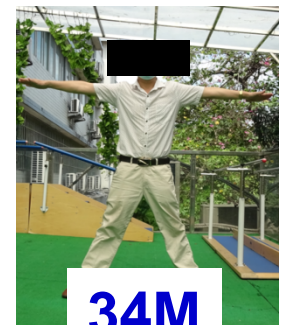

No progress of femoral head collapse, but being healing;  
weight-bearing walking
